# Supplementary material for: The Effect of Stoichiometry, Mg-Ca Distribution, and Iron, Manganese, and Zinc Impurities on the Dolomite Order Degree: A Theoretical Study
Source: MDPI journal article supplement (doi:10.3390/min11070702), 2021-06-29
Supplement: s1 [file s1]

## Supporting Information

### The Effect of Stoichiometry, Mg-Ca Distribution, and Iron, Manganese, and Zinc Impurities on the Dolomite Order Degree: A Theoretical Study

Yuliya Zvir <sup>1</sup>, Carlos Pimentel <sup>2,\*</sup> and Carlos M. Pina <sup>1,3,\*</sup>

<sup>1</sup> Departamento de Mineralogía y Petrología. Universidad Complutense de Madrid, E-28040 Madrid, Spain; yzvir@ucm.es

<sup>2</sup> Instituto Andaluz de Ciencias de la Tierra (CSIC-UGR), E-18100 Armilla, Granada, Spain

<sup>3</sup> Instituto de Geociencias (UCM-CSIC), E-28040 Madrid, Spain

\* Correspondence: c.pimentel@csic.es (C.P.); cmpina@geo.ucm.es (C.M.P.)

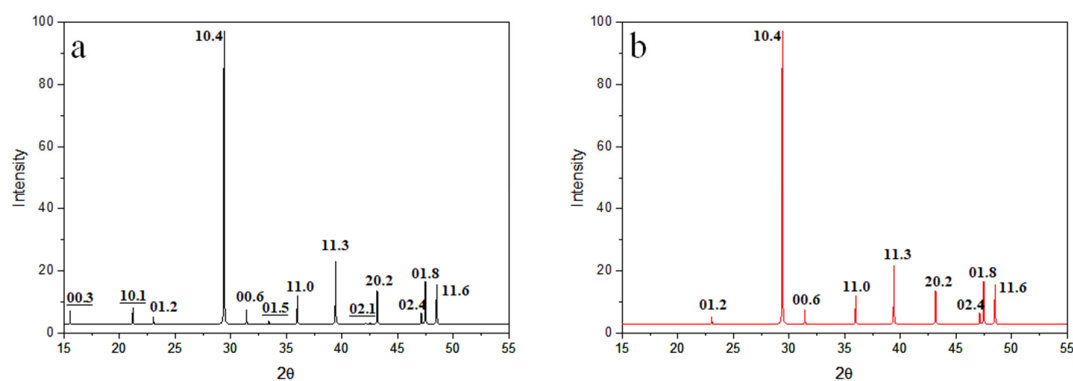

**Figure S1.** Diffractograms calculated with the RIETAN-FP code (Izumi and Momma, 2007, [19]) for a stoichiometric dolomite structure: (a) fully ordered:  $x_{Mg} = 1$ ; (b) fully disordered:  $x_{Mg} = 0.5$ . In both diffractograms superstructure indexes appear underlined. Calculations have been conducted from a calcite structure (Maslen et al., 1995, [18]) as starting structure.

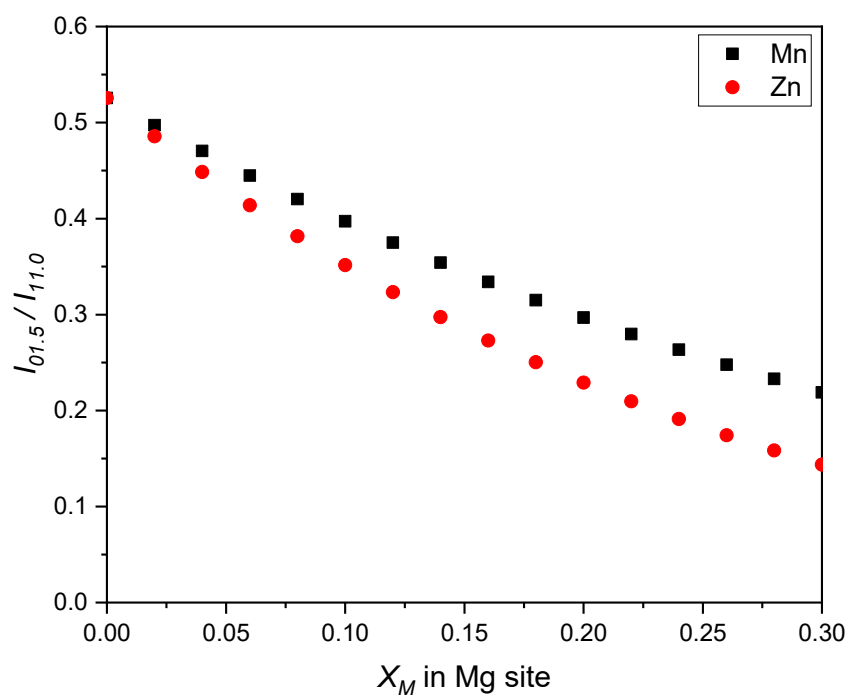

**Figure S2.**  $I_{01.5}/I_{11.0}$  versus  $X_M$  (M = Mn or Zn) for dolomites with Mn and Zn impurities in the Mg site.
